# Supplementary material
Source: MDPI journal article supplement (https://www.mdpi.com/2079-3197/8/4/106)
Supplement: s1 [file s1]

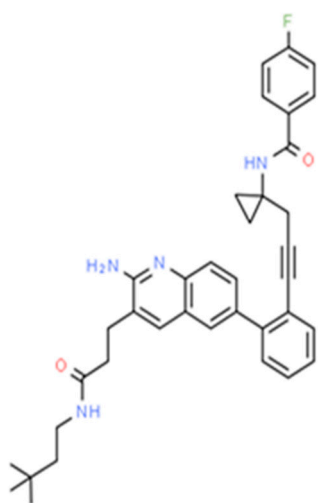

FigureS2: : 5i3v

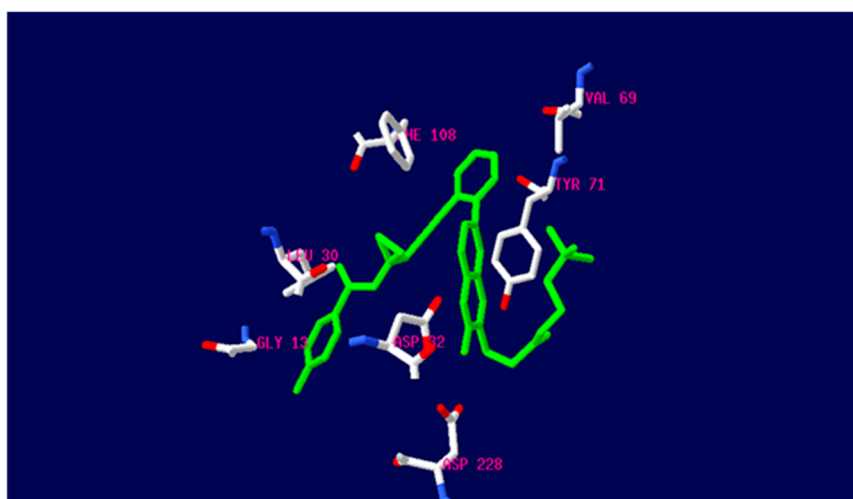

FigureS2: : Different views of binding of inhibitor 4 in 5i3v

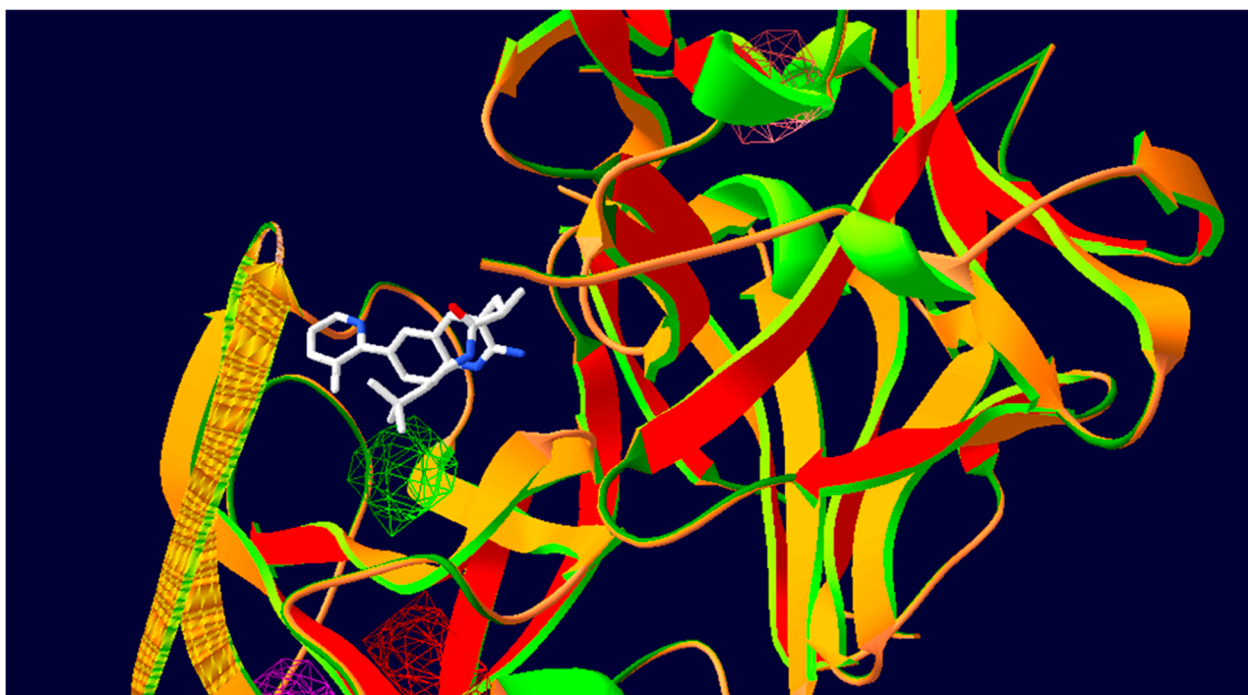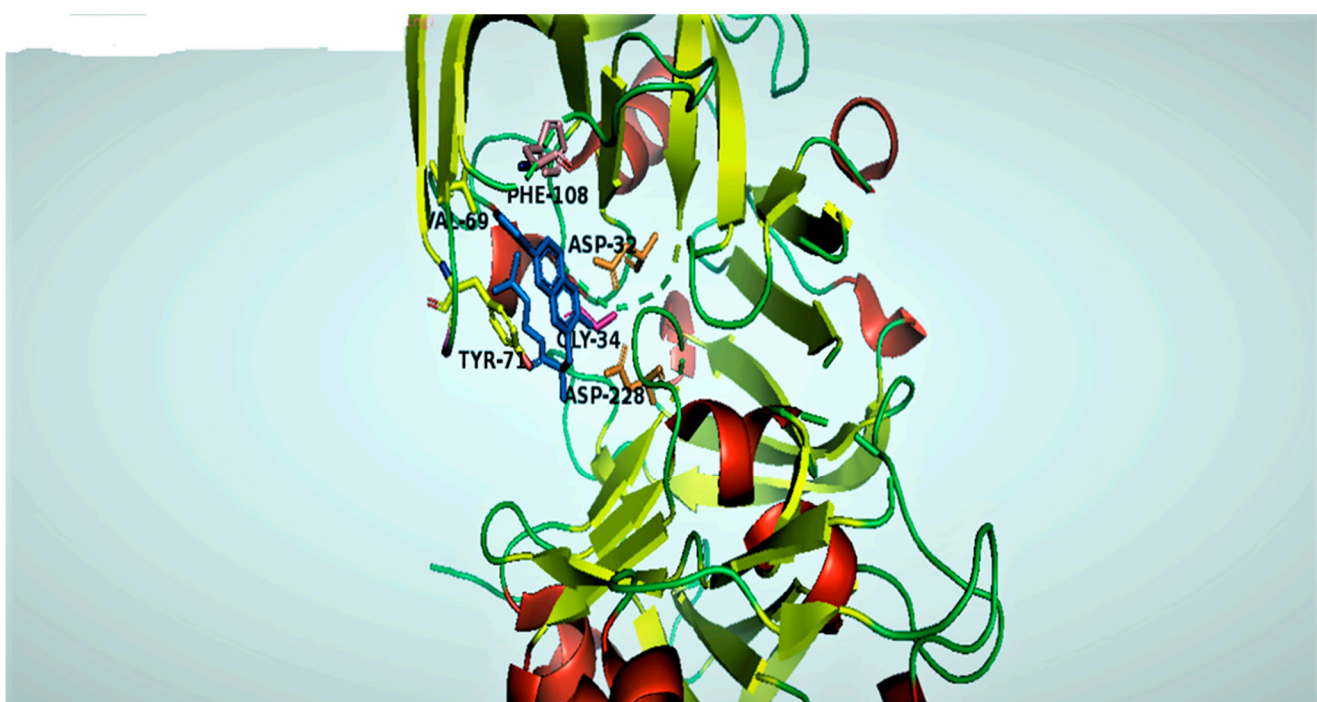

Figure S3: Binding mode of Inhibitor 6 in 4LC7 Different views

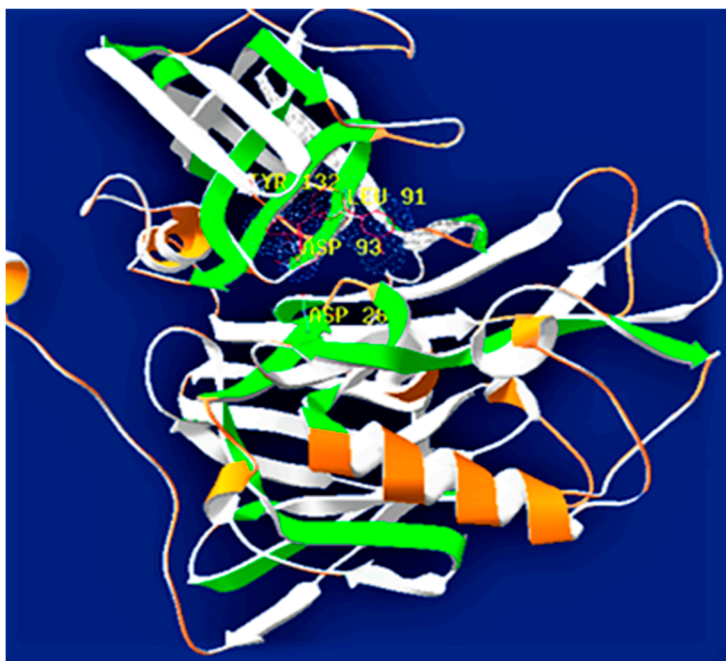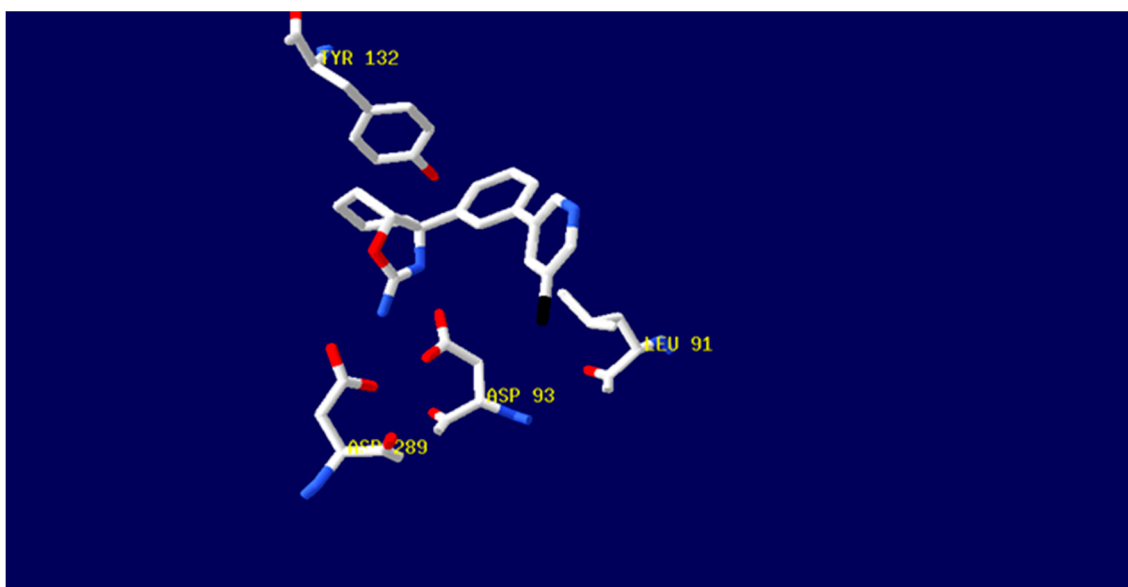

FigureS4: protein view of inhibitor 7 in 3TPP

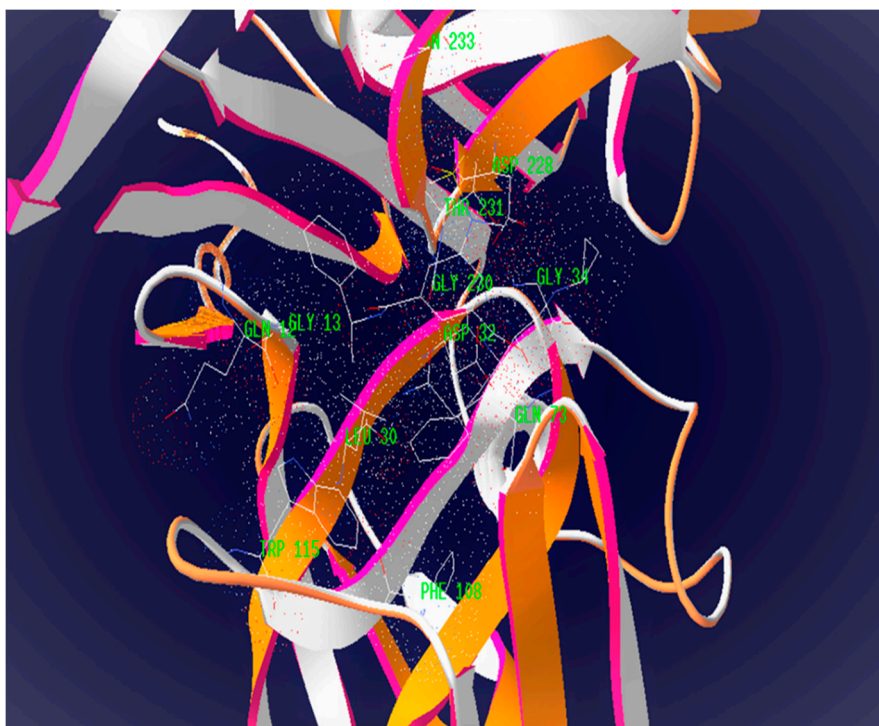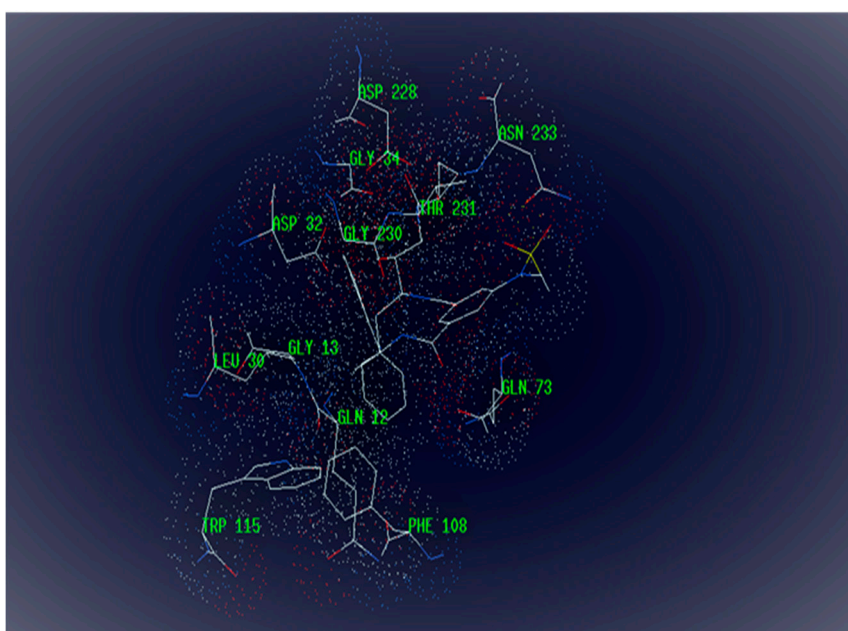

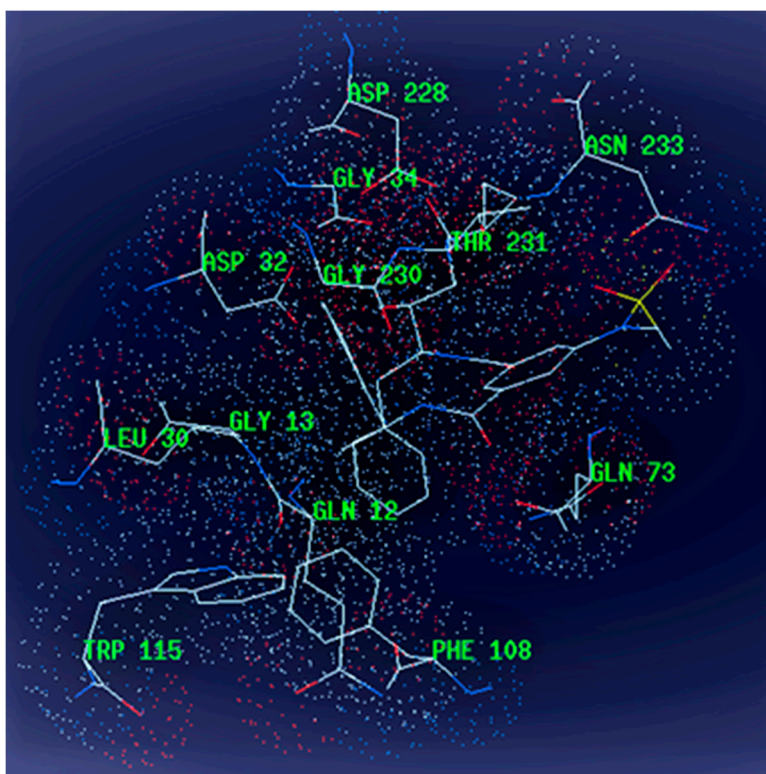

FigureS5 surface areas of inhibitors and the BACE1 surface

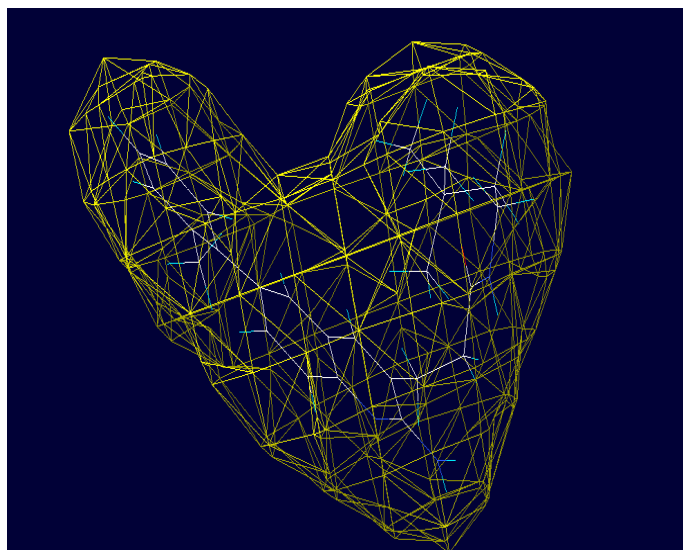

6BS -30.5



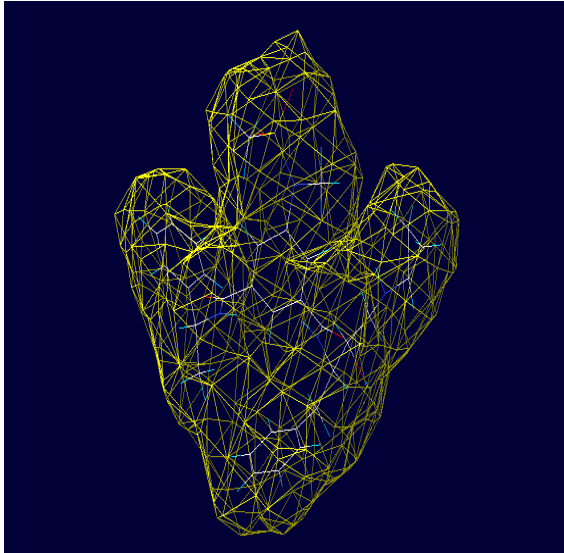

5HA -35.6

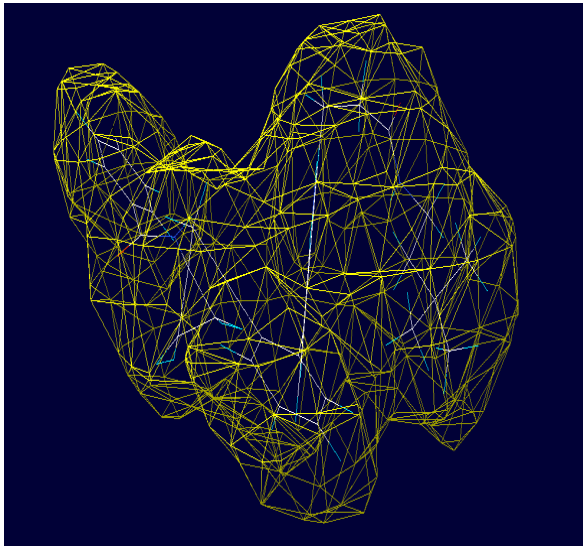

68j

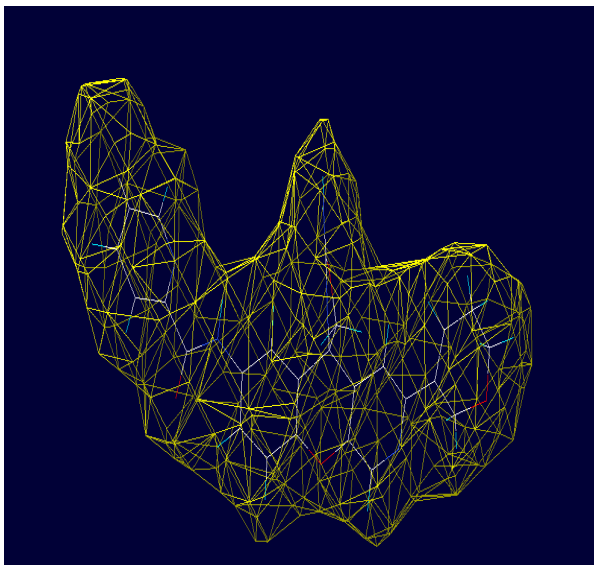

68K

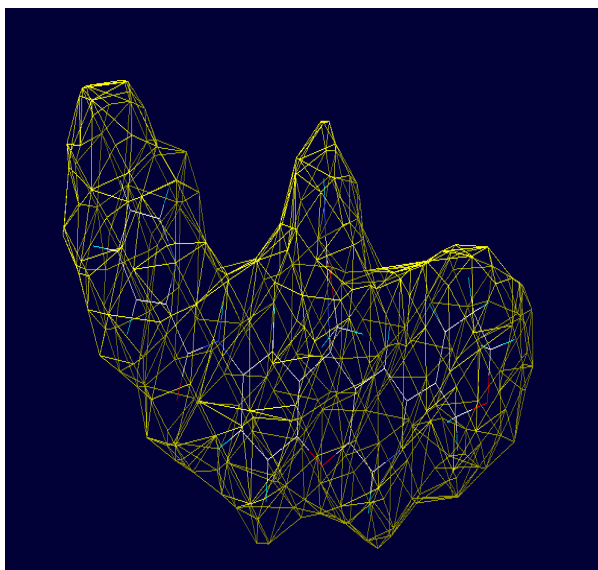

68L

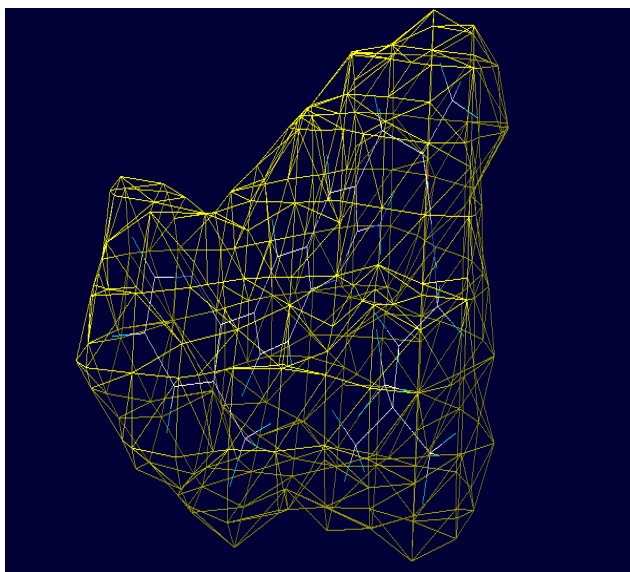

68M

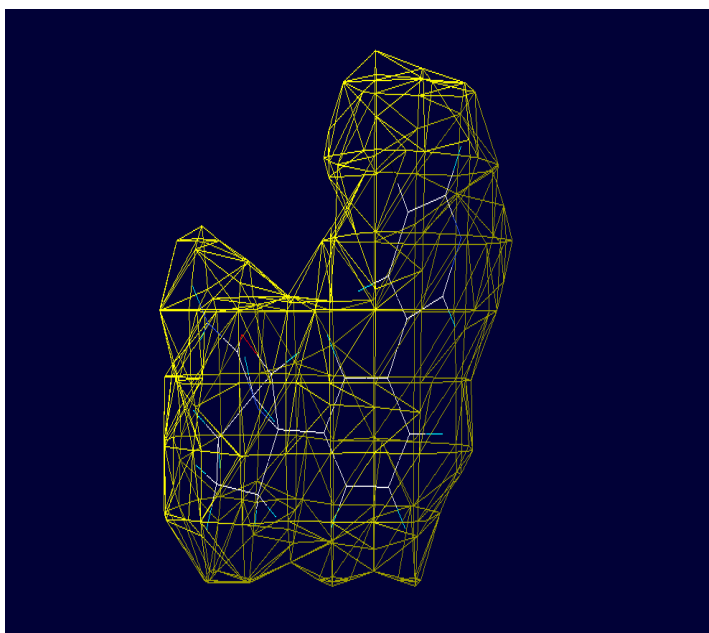

1WP

Figure S6: Views of Inhibitor 3 binding protein view (5ie1)

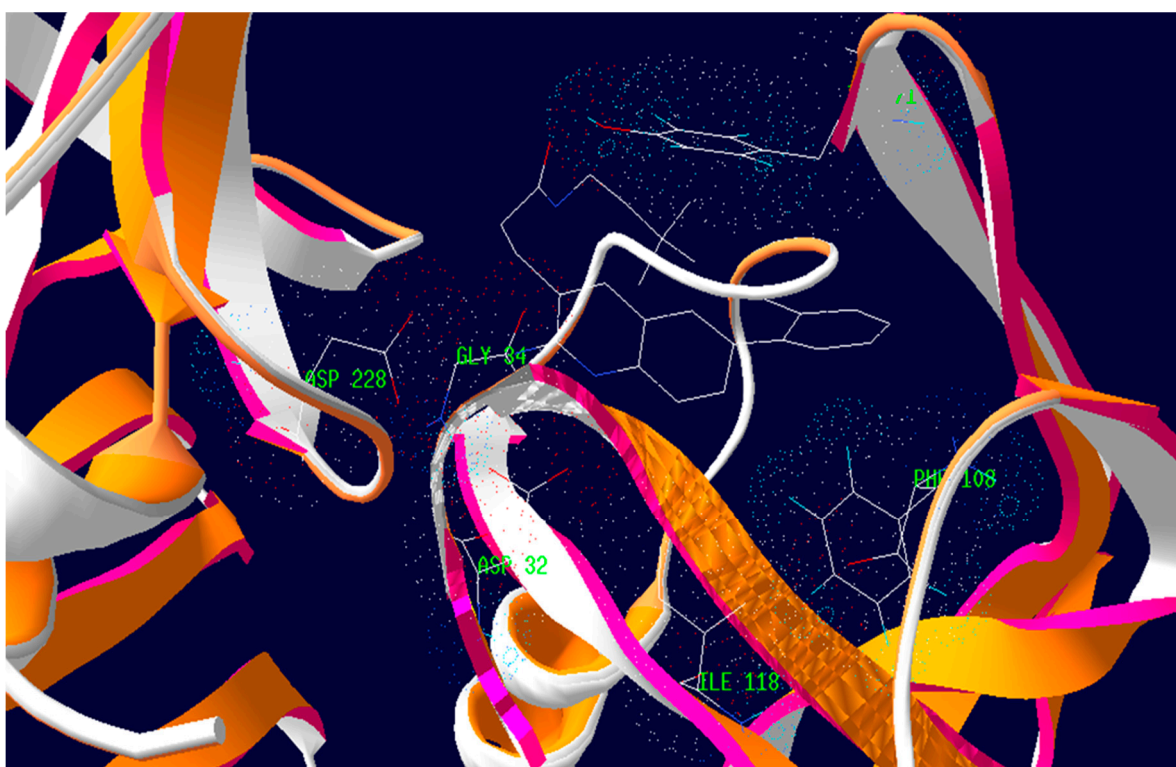

Figure S7: views of inhibitor 2 to BACE1 (5i3Y)



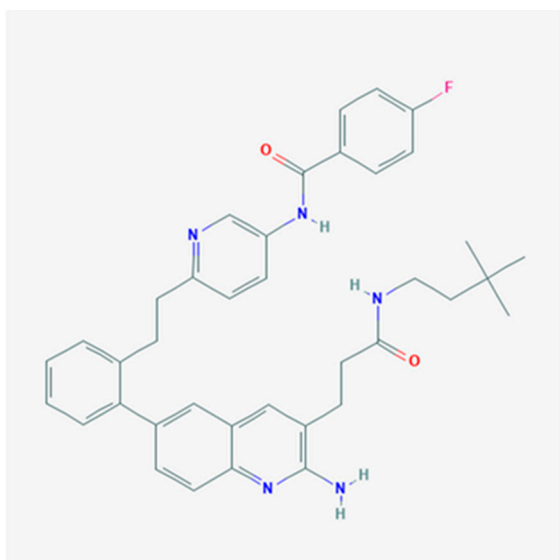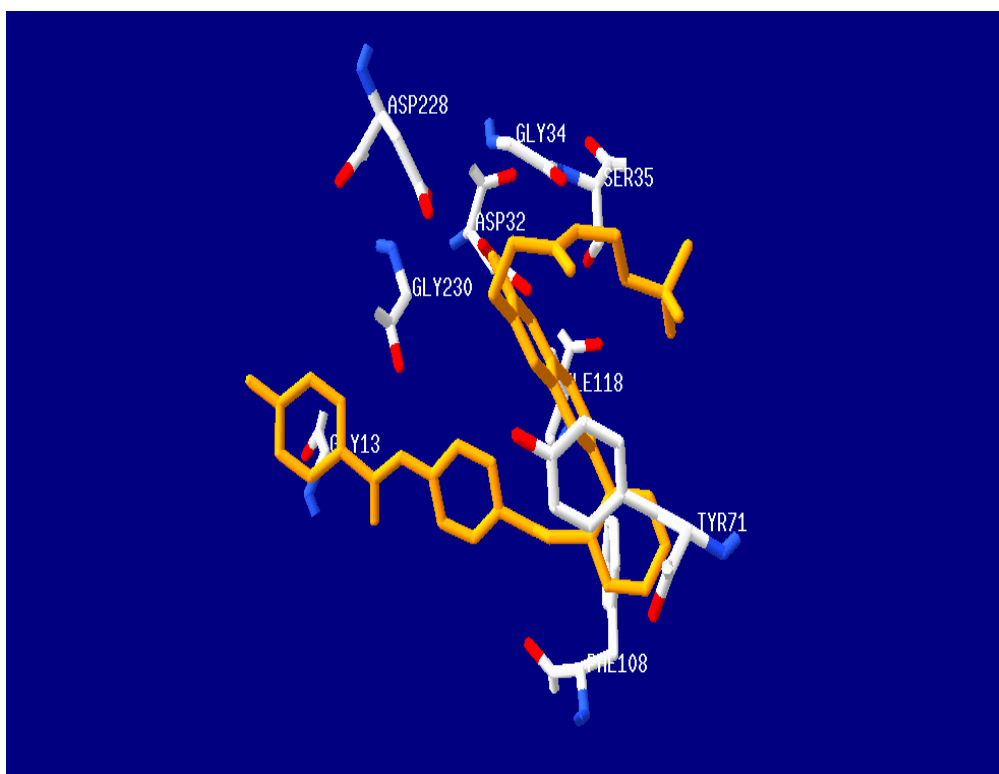

Figure S8: 5i3W binding of inhibitor 5 to BACE1

For Educational Use Only

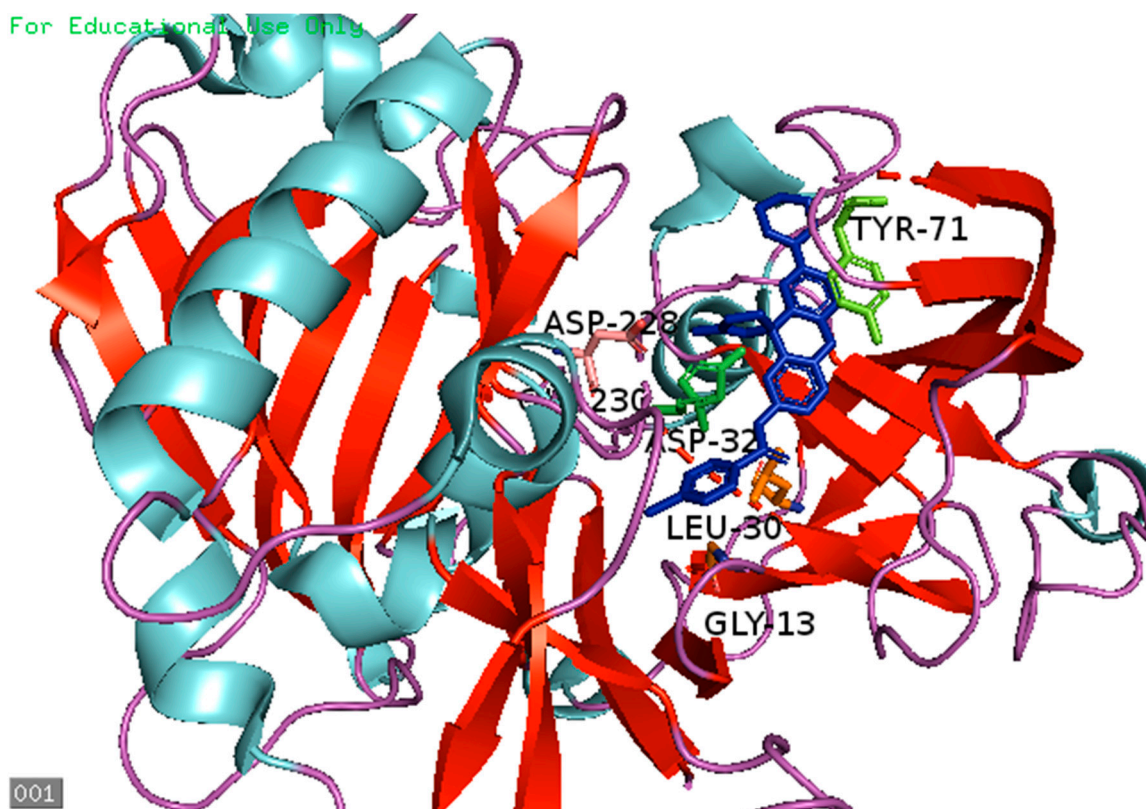

Figure S9: The dendrogram (cluster trees) of the BACE1-Inhibitor in 5i3X

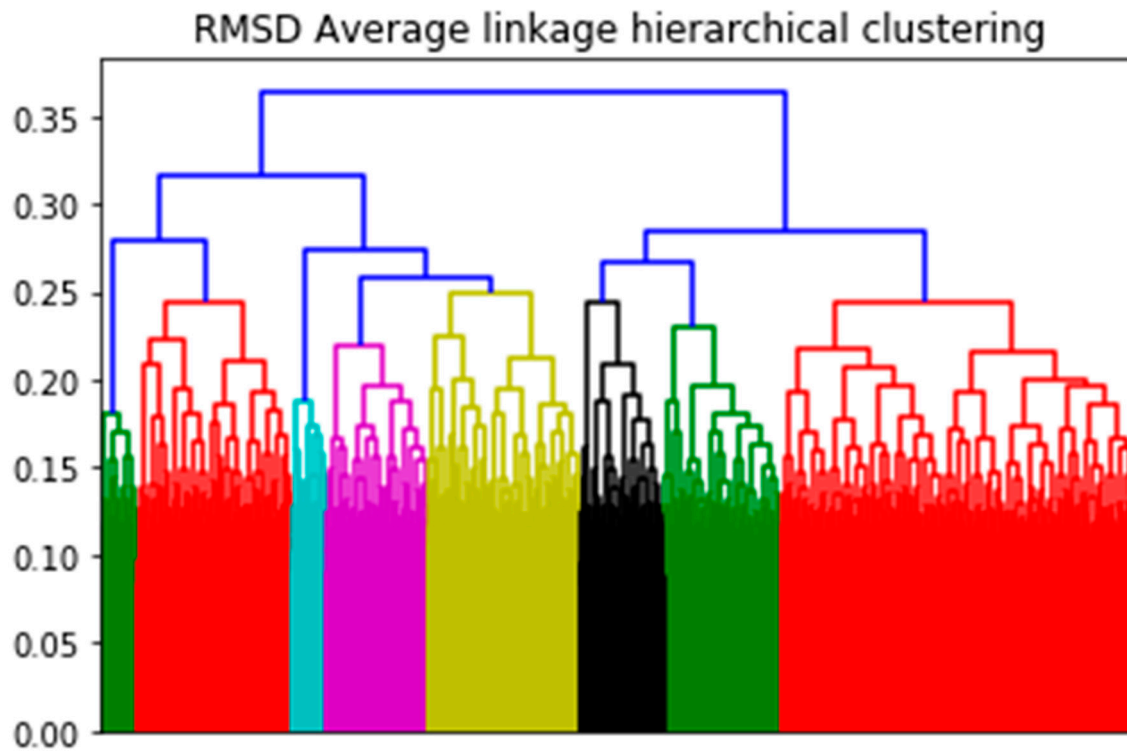

Figure S10: The dendrogram (cluster trees) of the BACE1-Inhibitor in 5i3X complex employing RMSD.
